# Supplementary material
Source: publisher site journal article supplement (https://www.dovepress.com/article/278718)

**Supplemental Table 1:** Survey Participants Demographics (*N* = 253)

|                                                                                      |                   |                                                                               |            |
|--------------------------------------------------------------------------------------|-------------------|-------------------------------------------------------------------------------|------------|
| Age, years                                                                           |                   | What is your marital status?, <i>N</i> (%)                                    |            |
| Mean ( <i>SD</i> )                                                                   | 45.42 (13.8)      | Married                                                                       | 85 (33.6)  |
| Median ( <i>IQR</i> )                                                                | 46.0 (34.0, 56.0) | Divorced                                                                      | 54 (21.3)  |
| Range                                                                                | 18.0 - 78.0       | Widowed                                                                       | 12 (4.7)   |
| Gender, <i>N</i> (%)                                                                 |                   | Separated                                                                     | 15 (5.9)   |
|                                                                                      |                   | Never married                                                                 | 54 (21.3)  |
|                                                                                      |                   | Member of unmarried couple                                                    | 19 (7.5)   |
|                                                                                      |                   | Decline to answer                                                             | 14 (5.5)   |
| Which of the following races do you identify as?, <i>N</i> (%)                       |                   | What is the highest grade or year of school you have completed?, <i>N</i> (%) |            |
| White                                                                                | 142 (56.1)        | Grades 1 - 8 (elementary school)                                              | 6 (2.4)    |
| Black or African American                                                            | 16 (6.3)          | Grades 9 - 11 (high school)                                                   | 27 (10.7)  |
| American Indian or Alaskan Native                                                    | 11 (4.3)          | Grade 12 or GED (high school graduate)                                        | 74 (29.2)  |
| Asian                                                                                | 4 (1.6)           | College 1 - 3 years (some college or technical school)                        | 101 (39.9) |
| Pacific Islander                                                                     | 3 (1.2)           | College 4 years or more (college degree)                                      | 29 (11.5)  |
| Other                                                                                | 71 (28.1)         | Post college (master's or higher)                                             | 9 (3.6)    |
| Decline to answer                                                                    | 21 (8.3)          | Decline to answer                                                             | 7 (2.8)    |
| Do you identify as Hispanic, Latino/a, or Spanish origin?, <i>N</i> (%)              |                   | What is the primary source of your Healthcare coverage?, <i>N</i> (%)         |            |
| Yes                                                                                  | 106 (41.9)        | A plan purchased through an employer or union (including                      | 25 (9.9)   |
| No                                                                                   | 131 (51.8)        | A plan that you or another family member buys on your                         | 10 (4.0)   |
| Decline to answer                                                                    | 16 (6.3)          | Medicare                                                                      | 57 (22.5)  |
| What is your current employment status?, <i>N</i> (%)                                |                   | Medicaid or other state program                                               | 111 (43.9) |
|                                                                                      |                   | TRICARE (formerly CHAMPUS), VA, or military                                   | 4 (1.6)    |
|                                                                                      |                   | Alaska Native, Indian Health Services, Tribal Health                          | 1 (0.4)    |
|                                                                                      |                   | Some other source                                                             | 35 (13.8)  |
|                                                                                      |                   | None (no coverage)                                                            | 10 (4.0)   |
|                                                                                      |                   | How many people live in your household? Adults over 18, <i>N</i> (%)          |            |
|                                                                                      |                   | Missing                                                                       | 2 (0.8)    |
|                                                                                      |                   | Zero                                                                          | 11 (4.3)   |
| Have you ever served on active duty in the United States Armed Forces, either in the |                   | One                                                                           | 59 (23.3)  |
|                                                                                      |                   | Two                                                                           | 95 (37.5)  |
|                                                                                      |                   | Three                                                                         | 40 (15.8)  |
|                                                                                      |                   | Four                                                                          | 30 (11.9)  |
| What is your annual household income from all sources?, <i>N</i> (%)                 |                   | Five                                                                          | 12 (4.7)   |
|                                                                                      |                   | Six                                                                           | 3 (1.2)    |
| Less than \$10,000                                                                   | 78 (30.8)         | Nine                                                                          | 1 (0.4)    |
| \$10,000 - \$15,000                                                                  | 40 (15.8)         | How many people live in your household? Children under 18, <i>N</i> (%)       |            |
| \$15,000 - \$20,000                                                                  | 24 (9.5)          | Missing                                                                       | 2 (0.8)    |
| \$20,000 - \$25,000                                                                  | 15 (5.9)          | Zero                                                                          | 143 (56.5) |
| \$25,000 - \$30,000                                                                  | 28 (11.1)         | One                                                                           | 41 (16.2)  |
| \$35,000 - \$50,000                                                                  | 28 (11.1)         | Two                                                                           | 36 (14.2)  |
| \$50,000 - \$75,000                                                                  | 11 (4.3)          | Three                                                                         | 16 (6.3)   |
| \$75,000 - \$125,000                                                                 | 8 (3.2)           | Four                                                                          | 10 (4.0)   |
| \$125,000 - \$200,000                                                                | 16 (6.3)          | Five                                                                          | 3 (1.2)    |
| more than \$200,000                                                                  | 1 (0.4)           | Seven                                                                         | 1 (0.4)    |
| Missing                                                                              | 4 (1.6)           | Nine                                                                          | 1 (0.4)    |

**Supplemental Table 1:** Demographic Information. Participants were 45.4±13.8 (Mean±SD) years old, the majority identified as white, non-Hispanic, had an annual household income of less/equal than \$20,000, and received healthcare coverage through Medicare or Medicaid. Descriptive data are presented as *N* and percent replies per question (%).

**Supplemental Table 2: Awareness (*N* = 253, *N* = 6 missing)**

---

|                                                                                                                           |  |            |
|---------------------------------------------------------------------------------------------------------------------------|--|------------|
| Do you know somebody (family, friend, neighbor) that has used CBD products?, <i>N</i> (%)                                 |  |            |
| Yes                                                                                                                       |  | 199 (80.6) |
| No                                                                                                                        |  | 48 (19.4)  |
| Did anyone that knows you (family, friend, neighbor) ever suggest you use a CBD product for your pain?, <i>N</i> (%)      |  |            |
| Yes                                                                                                                       |  | 199 (80.6) |
| No                                                                                                                        |  | 48 (19.4)  |
| Did any of your treating providers ever suggest you use a CBD product for your condition?, <i>N</i> (%)                   |  |            |
| Yes                                                                                                                       |  | 73 (29.6)  |
| No                                                                                                                        |  | 174 (70.4) |
| Do you know somebody (family, friend, neighbor) who benefited from using a CBD product for their condition?, <i>N</i> (%) |  |            |
| Yes                                                                                                                       |  | 193 (78.1) |
| No                                                                                                                        |  | 54 (21.9)  |
| Do you know somebody (family, friend, neighbor) who developed side effects using CBD products?, <i>N</i> (%)              |  |            |
| Yes                                                                                                                       |  | 18 (7.3)   |
| No                                                                                                                        |  | 229 (92.7) |
| Are you interested in learning about the use of CBD products to treat medical conditions?, <i>N</i> (%)                   |  |            |
| Yes                                                                                                                       |  | 227 (91.9) |
| No                                                                                                                        |  | 20 (8.1)   |

---

**Supplemental Table 2: Awareness.** Participants reported to know somebody that has used and benefited from a CBD product, while they know few people who have developed side effects. Participants also have been suggested by someone familiar to use a CBD product, and are interested in learning about CBD products. 29.6% of participants furthermore report that their treating providers has suggested to use CBD. Descriptive data are presented as *N* and percent replies per question (%).

---

**Supplemental Table 3: Personal Experience, Other answer choices ad verbatim**

---

If a CBD product has helped your condition, what type of condition did it help? Check all that apply. *N* (%)

|                        |           |
|------------------------|-----------|
| Other (please specify) | 58 (22.9) |
|------------------------|-----------|

**Unedited, original responses:** Abdominal pain, All the above, Anxiety, Anxiety and Depression, Anxiety and panic disorder, Anxiety, dry skin, Arm pain, Arthritic hips, Arthritis, Asthma, heartburn, erectile dysfunction, depression, poor appetite, anxiety, Blood pressure, Calms my intestinal spasms, chronic nausea, Complete Ankle Replacement Surgery site, Cramps, Crohn's, Decline, Depression, insomnia, Didn't help, Digestive/IBS, Foot/knee, Hands, High blood pressure, Insomnia due to pain, Kidney disease, Kidney stone pain, Knee pain, knee-torn meniscus, Knees, Leg, hip pain, Legs, arthritis, Lumbar fusion, Multiple Sclerosis symptoms, Muscle Spasms, Nausea, Nerve pithy in feet, peripheral neuropathy, peripheral neuropathy bullet in spine, Quality of sleep, Rheumatoid Arthritis.. Knees, hands, elbows, Severe menstrual pain, insomnia, depression, anxiety, etc, Shoulder pain, Shoulder, knee, Skin condition, Sleep, Sleeplessness, Stress, Tendinitis & wrist strain

What types of products have you tried? Check all that apply. *N* (%)

|                        |          |
|------------------------|----------|
| Other (please specify) | 11 (4.3) |
|------------------------|----------|

**Unedited, original responses:** And we need oil, Cbd drops, CBD water, Concentrate, Gummy candies, Helpd, ive made my owns at one point., Other, Vape, Vape pen, Water

---

**Supplemental Table 3: Unedited, original responses under the 'Other' category from Table 1.**

Descriptive data are presented as *N* and percent replies per question (%). Unedited, original responses are presented verbatim.

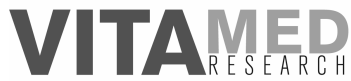

## CBD Survey for Patients

Thank you for visiting our survey!

New medical treatments are always being developed, and cannabidiol (CBD) has become increasingly popular.

Our goal is to learn about our patient's views on CBD products as a treatment for pain. You do not need to have used CBD products, or know what they are-- please be honest in your answers.

This survey is completely anonymous and entirely voluntary. You may exit the survey at any time. It should take about 7 minutes to complete.

We appreciate your participation!

## CBD Survey for Patients

### Demographics

1. What is your sex?

- ☐ Male
- ☐ Female
- ☐ Other
- ☐ Decline to answer

2. How old are you?

3. What zip code do you live in?

4. Which of the following races do you identify as?

- |                                                            |                                            |
|------------------------------------------------------------|--------------------------------------------|
| <input type="checkbox"/> White                             | <input type="checkbox"/> Pacific Islander  |
| <input type="checkbox"/> Black or African American         | <input type="checkbox"/> Other             |
| <input type="checkbox"/> American Indian or Alaskan Native | <input type="checkbox"/> Decline to answer |
| <input type="checkbox"/> Asian                             |                                            |

5. Do you identify as Hispanic, Latino/a, or Spanish origin?

- ☐ Yes
- ☐ No
- ☐ Decline to answer

6. What is your current employment status?

- |                                                       |                                                        |
|-------------------------------------------------------|--------------------------------------------------------|
| <input type="radio"/> Employed for wages              | <input type="radio"/> Homemaker                        |
| <input type="radio"/> Self-employed                   | <input type="radio"/> Student                          |
| <input type="radio"/> Unemployed for 1 year or more   | <input type="radio"/> Retired                          |
| <input type="radio"/> Unemployed for less than 1 year | <input type="radio"/> Unable to work due to disability |

7. What is your annual household income from all sources?

- |                                           |                                             |
|-------------------------------------------|---------------------------------------------|
| <input type="radio"/> Less than \$10,000  | <input type="radio"/> \$35,000 - \$50,000   |
| <input type="radio"/> \$10,000 - \$15,000 | <input type="radio"/> \$50,000 - \$75,000   |
| <input type="radio"/> \$15,000 - \$20,000 | <input type="radio"/> \$75,000 - \$125,000  |
| <input type="radio"/> \$20,000 - \$25,000 | <input type="radio"/> \$125,000 - \$200,000 |
| <input type="radio"/> \$25,000 - \$30,000 | <input type="radio"/> more than \$200,000   |

8. What is your marital status?

- |                                 |                                                  |
|---------------------------------|--------------------------------------------------|
| <input type="radio"/> Married   | <input type="radio"/> Never married              |
| <input type="radio"/> Divorced  | <input type="radio"/> Member of unmarried couple |
| <input type="radio"/> Widowed   | <input type="radio"/> Decline to answer          |
| <input type="radio"/> Separated |                                                  |

9. What is the highest grade or year of school you have completed?

- |                                                                           |                                                                              |
|---------------------------------------------------------------------------|------------------------------------------------------------------------------|
| <input type="radio"/> Never attended school or only attended kindergarten | <input type="radio"/> College 1 - 3 years (some college or technical school) |
| <input type="radio"/> Grades 1 - 8 (elementary school)                    | <input type="radio"/> College 4 years or more (college degree)               |
| <input type="radio"/> Grades 9 - 11 (high school)                         | <input type="radio"/> Post college (master's or higher)                      |
| <input type="radio"/> Grade 12 or GED (high school graduate)              | <input type="radio"/> Decline to answer                                      |

10. What is the primary source of your health care coverage?

- |                                                                                                                                   |                                                                                     |
|-----------------------------------------------------------------------------------------------------------------------------------|-------------------------------------------------------------------------------------|
| <input type="radio"/> A plan purchased through an employer or union (including plans purchased through another person's employer) | <input type="radio"/> TRICARE (formerly CHAMPUS), VA, or military                   |
| <input type="radio"/> A plan that you or another family member buys on your own                                                   | <input type="radio"/> Alaska Native, Indian Health Services, Tribal Health Services |
| <input type="radio"/> Medicare                                                                                                    | <input type="radio"/> Some other source                                             |
| <input type="radio"/> Medicaid or other state program                                                                             | <input type="radio"/> None (no coverage)                                            |

11. Have you ever served on active duty in the United States Armed Forces, either in the regular military or in a National Guard or military reserve unit?

- ☐ Yes
- ☐ No

12. How many people live in your household?

Adults over 18?

Children under 18?

## CBD Survey for Patients

### Awareness and Efficacy

1. Do you know somebody (family, friend, neighbor) that has used CBD products?

☐ Yes

☐ No

2. Did anyone that knows you (family, friend, neighbor) ever suggest you use a CBD product for your pain?

☐ Yes

☐ No

3. Did any of your treating providers ever suggest you use a CBD product for your condition?

☐ Yes

☐ No

4. Do you know somebody (family, friend, neighbor) who benefited from using a CBD product for their condition?

☐ Yes

☐ No

5. Do you know somebody (family, friend, neighbor) who developed side effects using CBD products?

☐ Yes

☐ No

6. Are you interested in learning about the use of CBD products to treat medical conditions?

☐ Yes

☐ No

## CBD Survey for Patients

### Personal Experience

1. Have you tried a CBD product?

- ☐ Yes
- ☐ No
- ☐ Decline to answer



## CBD Survey for Patients

### Personal Experience

1. Do you believe the CBD product has helped your condition?

Not at all

Not really

A little bit

A lot

Completely

☐☐☐☐☐

2. If a CBD product has helped your condition, what type of condition did it help?

☐ Back pain

☐ Nerve pain

☐ Neck pain

☐ Fibromyalgia

☐ Limb pain

☐ Migraines

☐ Other (please specify)

3. What types of products have you tried? Check all that apply

☐ Oral tincture

☐ Cream

☐ Edible

☐ Ointment/oil

☐ Capsule/pills

☐ Inhaled/smoked

☐ Spray

☐ Other (please specify)

4. Did any of the CBD products you used contain THC (the chemical that gets you "high")?

☐ Yes

☐ No

☐ I don't know

☐ Decline to answer

5. Please choose the answer that best applies to this statement: I was able to reduce the amount of pain medication I take by using CBD products.

| Strongly disagree     | Disagree              | Neither agree nor disagree | Agree                 | Strongly agree        |
|-----------------------|-----------------------|----------------------------|-----------------------|-----------------------|
| <input type="radio"/> | <input type="radio"/> | <input type="radio"/>      | <input type="radio"/> | <input type="radio"/> |

6. Please choose the answer that best applies to this statement: I was able to reduce the amount of opioid medication I take by using CBD products. (e.g., Percocet, Norco, Morphine, Oxycodone)

| Strongly disagree     | Disagree              | Neither agree nor disagree | Agree                 | Strongly agree        |
|-----------------------|-----------------------|----------------------------|-----------------------|-----------------------|
| <input type="radio"/> | <input type="radio"/> | <input type="radio"/>      | <input type="radio"/> | <input type="radio"/> |

## CBD Survey for Patients

### Knowledge

1. Do you know if there is a difference between medical marijuana and CBD?

- ☐ No, there is no difference
- ☐ I don't know
- ☐ Yes, there is a difference

2. If you have used CBD products in the past, are you familiar with how much CBD is in the product you have used?

- ☐ Extremely familiar
- ☐ Very familiar
- ☐ Somewhat familiar
- ☐ Not so familiar
- ☐ Not at all familiar
- ☐ I have not used CBD products

## CBD Survey for Patients

### Opinions

1. I believe CBD is a good treatment option

| Strongly disagree     | Disagree              | Neither agree nor disagree | Agree                 | Strongly agree        |
|-----------------------|-----------------------|----------------------------|-----------------------|-----------------------|
| <input type="radio"/> | <input type="radio"/> | <input type="radio"/>      | <input type="radio"/> | <input type="radio"/> |

2. I believe CBD is harmful

| Strongly disagree     | Disagree              | Neither agree nor disagree | Agree                 | Strongly agree        |
|-----------------------|-----------------------|----------------------------|-----------------------|-----------------------|
| <input type="radio"/> | <input type="radio"/> | <input type="radio"/>      | <input type="radio"/> | <input type="radio"/> |

3. I believe CBD can be addictive

| Strongly disagree     | Disagree              | Neither agree nor disagree | Agree                 | Strongly agree        |
|-----------------------|-----------------------|----------------------------|-----------------------|-----------------------|
| <input type="radio"/> | <input type="radio"/> | <input type="radio"/>      | <input type="radio"/> | <input type="radio"/> |

## CBD Survey for Patients

### Interest

1. If I were to consider using CBD, I would feel more comfortable if it was prescribed by a doctor

| Strongly disagree     | Disagree              | Neither agree nor disagree | Agree                 | Strongly agree        |
|-----------------------|-----------------------|----------------------------|-----------------------|-----------------------|
| <input type="radio"/> | <input type="radio"/> | <input type="radio"/>      | <input type="radio"/> | <input type="radio"/> |

2. I would prefer to buy CBD products from my doctor over other sources (smoke shops, dispensaries, internet)

| Strongly disagree     | Disagree              | Neither agree nor disagree | Agree                 | Strongly agree        |
|-----------------------|-----------------------|----------------------------|-----------------------|-----------------------|
| <input type="radio"/> | <input type="radio"/> | <input type="radio"/>      | <input type="radio"/> | <input type="radio"/> |

**Thank you for participating in our survey to study the use of CBD treatments!**

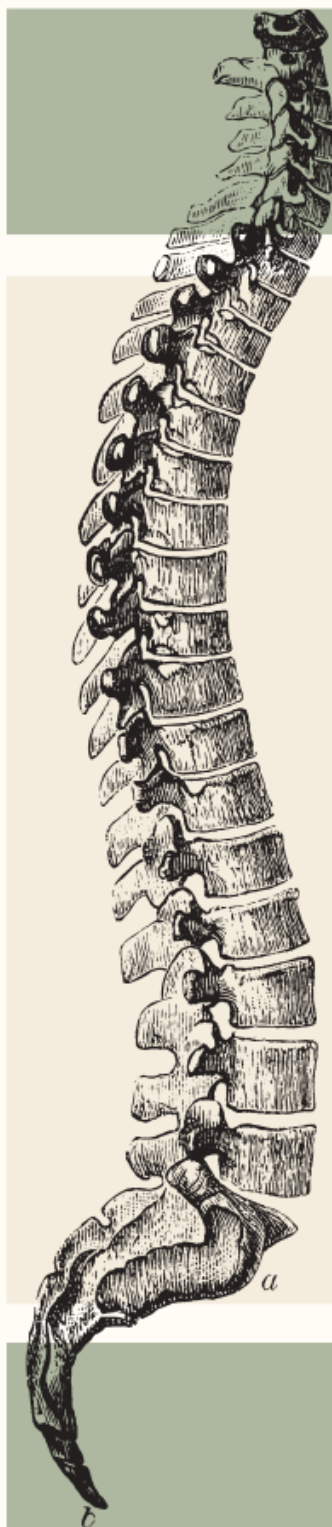

**WE'D LIKE YOUR OPINION ON  
CBD AS A  
TREATMENT  
FOR PAIN**

**PLEASE HELP US LEARN MORE  
ABOUT PATIENT VIEWS ON CBD  
PRODUCTS BY FILLING OUT OUR  
ONLINE SURVEY.**

scan this code with your camera app  
or visit <https://www.research.net/r/76HLD98>

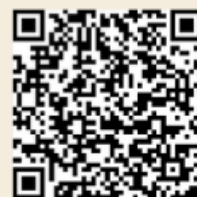

### Supplemental Material 3: Recruitment – Business Card

#### Front

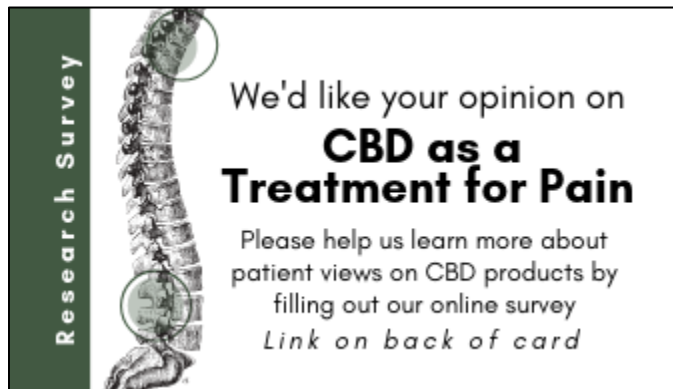

#### Back

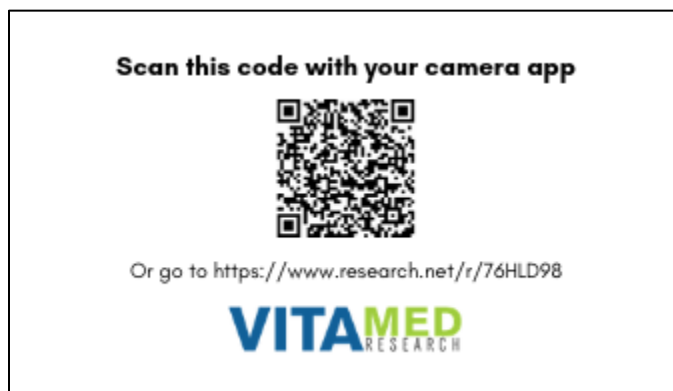

Supplement: Supplementary file 1 [file get_supplementary_file.php]
